# Supplementary material for: RNA sequencing, selection of reference genes and demonstration of feeding RNAi in Thrips tabaci (Lind.) (Thysanoptera: Thripidae)
Source: PubMed Central journal article supplement (PMC6380046; doi:10.1186/s12867-019-0123-1), 2019-02-18
Supplement: 12867_2019_123_MOESM4_ESM.pdf [file 12867_2019_123_MOESM4_ESM.pdf]

**Table S1: Characteristics of amplicons of candidate reference genes amplified using gene specific primers**

| <b>Gene Symbol</b> | <b>Product Tm (°C)</b> | <b>Amplicon length</b> | <b>Efficiency</b> | <b>Amplification efficiency</b> | <b>Correlation coefficient</b> |
|--------------------|------------------------|------------------------|-------------------|---------------------------------|--------------------------------|
| <i>Actin</i>       | 84                     | 110                    | 1.79              | 78.56                           | 0.99                           |
| <i>18s</i>         | 82                     | 100                    | 1.85              | 84.58                           | 0.97                           |
| <i>28s</i>         | 79                     | 100                    | 1.88              | 88.3                            | 0.99                           |
| <i>TUB</i>         | 82                     | 114                    | 1.83              | 82.96                           | 0.98                           |
| <i>GADPH</i>       | 82                     | 120                    | 1.73              | 72.57                           | 0.94                           |
| <i>EF</i>          | 84                     | 111                    | 2.01              | 100.71                          | 1                              |
| <i>RPL17</i>       | 83                     | 103                    | 1.95              | 94.97                           | 0.95                           |
| <i>Hist3</i>       | 82                     | 113                    | 2.45              | 144.68                          | 0.99                           |
| <i>UbiCE</i>       | 83                     | 113                    | 1.87              | 86.8                            | 0.99                           |
| <i>TATA</i>        | 81                     | 114                    | 1.97              | 97.3                            | 1                              |
| <i>E2F</i>         | 83                     | 100                    | 1.92              | 92.11                           | 0.98                           |
| <i>vATPase</i>     | 81                     | 103                    | 2.75              | 175.1                           | 0.79                           |
| <i>SOD</i>         | 84                     | 102                    | 1.96              | 95.94                           | 0.99                           |
| <i>GSTD2</i>       | 80                     | 100                    | 1.86              | 86.38                           | 0.99                           |

**Table S2. Detailed Bestkeeper analysis for all candidate reference genes**

| <b>ADULT</b>                                |                   |            |            |            |           |              |              |             |            |            |              |
|---------------------------------------------|-------------------|------------|------------|------------|-----------|--------------|--------------|-------------|------------|------------|--------------|
|                                             |                   | <b>18S</b> | <b>28S</b> | <b>TUB</b> | <b>EF</b> | <b>RPL17</b> | <b>UBICE</b> | <b>TATA</b> | <b>E2F</b> | <b>SOD</b> | <b>GSTD2</b> |
| <b>geo mean</b>                             | <b>CP</b>         | 22.93      | 22.75      | 25.46      | 24.09     | 26.85        | 24.99        | 27.74       | 24.38      | 23.31      | 20.76        |
| <b>AR mean</b>                              | <b>CP</b>         | 22.94      | 22.76      | 25.47      | 24.09     | 26.85        | 24.99        | 27.74       | 24.38      | 23.32      | 20.77        |
| <b>Min</b>                                  | <b>CP</b>         | 21.94      | 22.05      | 24.53      | 23.94     | 26.82        | 24.48        | 27.68       | 24.15      | 22.35      | 20.17        |
| <b>Max</b>                                  | <b>CP</b>         | 23.94      | 23.47      | 26.41      | 24.24     | 26.88        | 25.50        | 27.79       | 24.72      | 24.10      | 21.51        |
| <b>Stddev</b>                               | <b>[± CP]</b>     | 0.67       | 0.47       | 0.63       | 0.10      | 0.02         | 0.34         | 0.04        | 0.23       | 0.65       | 0.49         |
| <b>Cv</b>                                   | <b>%CP</b>        | 2.91       | 2.08       | 2.46       | 0.42      | 0.07         | 1.36         | 0.13        | 0.93       | 2.77       | 2.38         |
| <b>Min</b>                                  | <b>x-fold</b>     | -1.98      | -1.63      | -1.90      | -1.11     | -1.02        | -1.42        | -1.04       | -1.17      | -1.94      | -1.51        |
| <b>Max</b>                                  | <b>x-fold</b>     | 2.02       | 1.64       | 1.93       | 1.11      | 1.02         | 1.43         | 1.04        | 1.27       | 1.73       | 1.68         |
| <b>Stddev</b>                               | <b>[± x-fold]</b> | 1.59       | 1.39       | 1.54       | 1.07      | 1.01         | 1.27         | 1.02        | 1.17       | 1.57       | 1.41         |
| <b>Pearson correlation coefficient</b>      |                   |            |            |            |           |              |              |             |            |            |              |
| <b>BestKeeper vs. coeff. of correlation</b> |                   | 0.997      | 0.997      | 0.997      | 0.001     | 0.997        | 0.997        | 0.997       | 0.001      | 0.994      | 0.969        |
| <b>p-value</b>                              |                   | 0.001      | 0.001      | 0.001      | 0.001     | 0.001        | 0.001        | 0.001       | 0.837      | 0.001      | 0.007        |
| <b>NYMPH</b>                                |                   |            |            |            |           |              |              |             |            |            |              |
|                                             |                   | <b>18S</b> | <b>28S</b> | <b>TUB</b> | <b>EF</b> | <b>RPL17</b> | <b>UBICE</b> | <b>TATA</b> | <b>E2F</b> | <b>SOD</b> | <b>GSTD2</b> |
| <b>geo Mean [CP]</b>                        | <b>CP</b>         | 24.66      | 24.13      | 24.97      | 25.53     | 25.67        | 28.13        | 25.33       | 25.37      | 23.50      | 20.56        |
| <b>ar Mean [CP]</b>                         | <b>CP</b>         | 24.69      | 24.18      | 25.00      | 25.65     | 25.71        | 28.13        | 25.34       | 25.39      | 23.52      | 20.58        |
| <b>min [CP]</b>                             | <b>CP</b>         | 23.84      | 23.09      | 23.46      | 23.24     | 24.49        | 27.91        | 24.41       | 24.28      | 22.53      | 19.77        |
| <b>max [CP]</b>                             | <b>CP</b>         | 26.36      | 26.30      | 26.54      | 29.00     | 27.87        | 28.24        | 26.27       | 26.64      | 25.00      | 22.00        |
| <b>stddev [± CP]</b>                        | <b>[± CP]</b>     | 1.12       | 1.41       | 1.03       | 2.24      | 1.44         | 0.15         | 0.62        | 0.83       | 0.98       | 0.94         |
| <b>CV [% CP]</b>                            | <b>%CP</b>        | 4.52       | 5.85       | 4.12       | 8.72      | 5.59         | 0.52         | 2.46        | 3.27       | 4.18       | 4.59         |
| <b>min [x-fold]</b>                         | <b>x-fold</b>     | -1.76      | -2.06      | -2.85      | -4.90     | -2.26        | -1.16        | -1.89       | -2.14      | -1.96      | -1.73        |
| <b>max [x-fold]</b>                         | <b>x-fold</b>     | 3.25       | 4.49       | 2.97       | 11.05     | 4.60         | 1.08         | 1.92        | 2.40       | 2.83       | 2.71         |
| <b>stddev [± x-fold]</b>                    | <b>[± x-</b>      | 2.17       | 2.66       | 2.04       | 4.71      | 2.71         | 1.11         | 1.54        | 1.78       | 1.98       | 1.92         |

|                                              |                   |            |            |            |           |              |              |             |            |            |              |
|----------------------------------------------|-------------------|------------|------------|------------|-----------|--------------|--------------|-------------|------------|------------|--------------|
|                                              | <b>fold]</b>      |            |            |            |           |              |              |             |            |            |              |
| <b>Pearson correlation coefficient ( r )</b> |                   |            |            |            |           |              |              |             |            |            |              |
| <b>BestKeeper vs.coeff. of corr. [r]</b>     |                   | 0.912      | 0.933      | 0.924      | 0.96      | 0.976        | 0.001        | 0.956       | 0.971      | 0.999      | 0.969        |
| <b>p-value</b>                               |                   | 0.031      | 0.021      | 0.025      | 0.01      | 0.004        | 0.028        | 0.011       | 0.006      | 0.001      | 0.006        |
| <b>STARVATION STRESS</b>                     |                   |            |            |            |           |              |              |             |            |            |              |
| <b>GENE</b>                                  |                   | <b>18S</b> | <b>28S</b> | <b>TUB</b> | <b>EF</b> | <b>RPL17</b> | <b>UBICE</b> | <b>TATA</b> | <b>E2F</b> | <b>SOD</b> | <b>GSTD2</b> |
| <b>geo mean</b>                              | <b>CP</b>         | 24.57      | 24.90      | 25.33      | 26.16     | 26.41        | 25.72        | 29.21       | 27.59      | 25.24      | 22.64        |
| <b>AR mean</b>                               | <b>CP</b>         | 24.57      | 24.92      | 25.33      | 26.16     | 26.43        | 25.72        | 29.21       | 27.59      | 25.27      | 22.65        |
| <b>Min</b>                                   | <b>CP</b>         | 24.00      | 23.77      | 25.03      | 25.92     | 25.00        | 25.40        | 28.87       | 27.28      | 24.00      | 22.06        |
| <b>Max</b>                                   | <b>CP</b>         | 24.97      | 26.06      | 25.63      | 26.59     | 27.39        | 26.34        | 29.69       | 28.00      | 27.18      | 23.76        |
| <b>Stddev</b>                                | <b>[± CP]</b>     | 0.38       | 0.77       | 0.20       | 0.29      | 0.95         | 0.41         | 0.32        | 0.27       | 1.27       | 0.74         |
| <b>Cv</b>                                    | <b>%CP</b>        | 1.56       | 3.08       | 0.79       | 1.10      | 3.61         | 1.61         | 1.10        | 0.99       | 5.03       | 3.27         |
| <b>Min</b>                                   | <b>x-fold</b>     | -1.48      | -2.19      | -1.23      | -1.18     | -2.66        | -1.25        | -1.26       | -1.24      | -2.36      | -1.49        |
| <b>Max</b>                                   | <b>x-fold</b>     | 1.32       | 2.23       | 1.23       | 1.35      | 1.97         | 1.54         | 1.40        | 1.33       | 3.85       | 2.18         |
| <b>Stddev</b>                                | <b>[± x-fold]</b> | 1.30       | 1.70       | 1.15       | 1.22      | 1.94         | 1.33         | 1.25        | 1.21       | 2.41       | 1.67         |
| <b>Pearson correlation coefficient</b>       |                   |            |            |            |           |              |              |             |            |            |              |
| <b>BestKeeper vs.coeff. of correlation</b>   |                   | 0.968      | 0.549      | 0.999      | 0.117     | 0.962        | 0.83         | 0.001       | 0.001      | 0.928      | 0.859        |
| <b>p-value</b>                               |                   | 0.007      | 0.338      | 0.001      | 0.851     | 0.009        | 0.082        | 0.006       | 0.166      | 0.023      | 0.062        |

**Table S3 : Normfinder based stability values of different candidate genes**

| <b>GENES</b> | <b>ADULT</b> | <b>NYMPH</b> | <b>Starvation<br/>Stress</b> |
|--------------|--------------|--------------|------------------------------|
| <i>18s</i>   | 0.164        | 0.083        | 0.007                        |
| <i>28s</i>   | 0.026        | 0.121        | 0.525                        |
| <i>TUB</i>   | 0.128        | 0.094        | 0.007                        |
| <i>EF</i>    | 0.210        | 1.451        | 0.162                        |
| <i>RPL17</i> | 0.098        | 0.109        | 0.357                        |
| <i>UbiCE</i> | 0.005        | 1.503        | 0.019                        |
| <i>TATA</i>  | 0.086        | 0.178        | 0.455                        |
| <i>E2F</i>   | 0.189        | 0.034        | 0.342                        |
| <i>SOD</i>   | 0.102        | 0.003        | 0.899                        |
| <i>GSTD2</i> | 0.029        | 0.003        | 0.181                        |

**Table S4 : Geometric mean ranking of candidate reference genes using RefFinder**

| <b>ADULT</b> |                                  | <b>NYMPH</b> |                                  | <b>Starvation stress</b> |                                  |
|--------------|----------------------------------|--------------|----------------------------------|--------------------------|----------------------------------|
| <b>GENES</b> | <b>Geomean of ranking values</b> | <b>GENES</b> | <b>Geomean of ranking values</b> | <b>GENES</b>             | <b>Geomean of ranking values</b> |
| <i>UbiCE</i> | 2.34                             | <i>E2F</i>   | 2.06                             | <i>TUB</i>               | 1.19                             |
| <i>28s</i>   | 3.13                             | <i>SOD</i>   | 2.11                             | <i>18s</i>               | 1.78                             |
| <i>TATA</i>  | 3.87                             | <i>TATA</i>  | 2.51                             | <i>UbiCE</i>             | 3.57                             |
| <i>RPL17</i> | 3.94                             | <i>GSTD2</i> | 3.66                             | <i>EF</i>                | 3.72                             |
| <i>GSTD2</i> | 4.21                             | <i>UbiCE</i> | 5.62                             | <i>E2F</i>               | 4.36                             |
| <i>TUB</i>   | 4.45                             | <i>TUB</i>   | 5.63                             | <i>GSTD2</i>             | 5.92                             |
| <i>18s</i>   | 5.03                             | <i>EF</i>    | 5.63                             | <i>TATA</i>              | 6.05                             |
| <i>SOD</i>   | 5.33                             | <i>RPL17</i> | 5.79                             | <i>RPL17</i>             | 7.97                             |
| <i>EF</i>    | 7.02                             | <i>28s</i>   | 8.18                             | <i>28s</i>               | 8.74                             |
| <i>E2F</i>   | 7.75                             | <i>18s</i>   | 9                                | <i>SOD</i>               | 10                               |

**Table S5 :Listof genes associated with RNAi mechanism identified in the *T. tabaci* assembled transcriptome at  $E$ -value  $< e^{-30}$ .  
\*Similarity; #Alignment length**

| Gene                         | CDS/Transcript Number      | Annotation                                                                                            | S-value     | S* | AL#  |
|------------------------------|----------------------------|-------------------------------------------------------------------------------------------------------|-------------|----|------|
| <b>DsRNA uptake</b>          |                            |                                                                                                       |             |    |      |
| SID-1                        | CDS_15961_transcript_14627 | gi 646715429 gb KDR19041.1 SID1<br>transmembrane family member 1<br>[ <i>Zootermopsisnevadensis</i> ] | 5.09814E-49 | 77 | 178  |
|                              | CDS_15962_transcript_14627 |                                                                                                       | 0           | 70 | 622  |
|                              | CDS_15963_transcript_14628 |                                                                                                       |             |    | 72   |
| Clathrin<br>Heavy Chain      | CDS_194_transcript_841     | gi 646720852 gb KDR22435.1 Clathrin heavy<br>chain [ <i>Zootermopsisnevadensis</i> ]                  | 0           | 97 | 1676 |
|                              | CDS_24400_transcript_25704 |                                                                                                       | 1.13E-77    | 96 | 137  |
|                              | CDS_25967_transcript_29416 |                                                                                                       | 1.1E-178    | 94 | 323  |
|                              | CDS_25967_transcript_29416 |                                                                                                       | 1.1E-178    | 94 | 323  |
| Innexin2                     | CDS_13894_transcript_12670 | gi 242014052 ref XP_002427712.1 Innexin inx2,<br>putative [ <i>Pediculushumanuscorporeis</i> ]        | 0           | 86 | 399  |
|                              | CDS_4215_transcript_4271   |                                                                                                       | 0           | 91 | 358  |
|                              | CDS_13893_transcript_12669 |                                                                                                       | 0           | 86 | 399  |
|                              | CDS_13894_transcript_12670 |                                                                                                       | 0           | 86 | 399  |
| <b>dsRNA cleavage</b>        |                            |                                                                                                       |             |    |      |
| Dicer-1                      | CDS_24712_transcript_26352 | gi 240247227 emb CAX68236.1 dicer-1<br>[ <i>Blattellagermanica</i> ]                                  | 0           | 64 | 807  |
|                              | CDS_25848_transcript_29057 |                                                                                                       | 5.3605E-161 | 78 | 415  |
|                              | CDS_23342_transcript_23605 |                                                                                                       | 1.38053E-30 | 71 | 154  |
| Dicer-2                      | CDS_20968_transcript_20034 | gi 406034947 emb CCF23094.1 Dicer 2<br>[ <i>Blattellagermanica</i> ]                                  | 3.9936E-157 | 47 | 1709 |
|                              | CDS_21294_transcript_20494 |                                                                                                       | 0           | 56 | 1653 |
| Drosha                       | CDS_20526_transcript_19507 | gi 646694518 gb KDR08017.1 Ribonuclease 3<br>[ <i>Zootermopsisnevadensis</i> ]                        | 0           | 86 | 982  |
| <b>Endonuclease activity</b> |                            |                                                                                                       |             |    |      |
| Argonaute 1                  | CDS_15926_transcript_14593 | gi 516306731 gb AGO85968.1 argonaute 1, partial<br>[ <i>Locustamigratoria</i> ]                       | 0           | 99 | 403  |
|                              | CDS_15921_transcript_14590 |                                                                                                       | 0           | 97 | 855  |
|                              | CDS_15922_transcript_14590 |                                                                                                       | 0           | 97 | 418  |
|                              | CDS_15923_transcript_14591 |                                                                                                       | 0           | 97 | 855  |

|                   |                                                                                                                                                                                                                                                              |                                                                                                                |                                                          |                                              |                                               |
|-------------------|--------------------------------------------------------------------------------------------------------------------------------------------------------------------------------------------------------------------------------------------------------------|----------------------------------------------------------------------------------------------------------------|----------------------------------------------------------|----------------------------------------------|-----------------------------------------------|
| Argonaute 2       | CDS_6124_transcript_5961<br>CDS_6122_transcript_5961<br>CDS_6123_transcript_5961<br>CDS_6125_transcript_5962<br>CDS_6126_transcript_5962<br>CDS_6128_transcript_5963<br>CDS_6130_transcript_5965<br>CDS_18274_transcript_16947<br>CDS_25525_transcript_28247 | gi 723784142 gb AIY24303.1 Argonaute 2<br>[ <i>Laodelphaxstriatella</i> ]                                      | 0<br>1.06074E-90<br>6.0224E-160<br>0<br>0<br>0<br>0<br>0 | 98<br>75<br>64<br>67<br>67<br>67<br>67<br>67 | 433<br>223<br>583<br>818<br>818<br>818<br>818 |
| PCDG 6<br>(ALG-6) | CDS_16858_transcript_15514<br>CDS_24257_transcript_25393                                                                                                                                                                                                     | gi 646723721 gb KDR24234.1 Programmed cell<br>death protein 6 [ <i>Zootermopsisnevadensis</i> ]                | 5.7885E-114<br>5.7885E-114                               | 97<br>97                                     | 175<br>175                                    |
| PIWI              | CDS_11559_transcript_10537<br>CDS_11560_transcript_10538                                                                                                                                                                                                     | gi 646703429 gb KDR12118.1 Piwi-like protein 1<br>[ <i>Zootermopsisnevadensis</i> ]                            | 0<br>0                                                   | 74<br>75                                     | 782<br>773                                    |
| Aub               | CDS_26052_transcript_29621<br>CDS_24257_transcript_25393                                                                                                                                                                                                     | gi 817196653 ref XP_012273923.1 PREDICTED:<br>protein aubergine-like isoform X2<br>[ <i>Orussusabietinus</i> ] | 8.02156E-39<br>8.49505E-40                               | 64<br>77                                     | 148<br>109                                    |
| Asp Spindle E     | CDS_828_transcript_1424<br>CDS_829_transcript_1425                                                                                                                                                                                                           | gi 646720534 gb KDR22214.1 Protein abnormal<br>spindle [ <i>Zootermopsisnevadensis</i> ]                       | 3.87747E-39<br>9.26456E-68                               | 50<br>73                                     | 558<br>232                                    |
| <b>Others</b>     |                                                                                                                                                                                                                                                              |                                                                                                                |                                                          |                                              |                                               |

|       |                            |                                   |             |    |      |
|-------|----------------------------|-----------------------------------|-------------|----|------|
| Tudor | CDS_9987_transcript_9161   | gi 646703152 gb KDR11968.1 Tudor  | 2.95608E-80 | 58 | 139  |
|       | CDS_9990_transcript_9164   | domain-containing protein 5       | 1.13593E-11 | 55 | 182  |
|       | CDS_10607_transcript_9637  | [ <i>Zootermopsisnevadensis</i> ] | 1.2331E-12  | 52 | 182  |
|       | CDS_10608_transcript_9638  |                                   | 1.20765E-12 | 52 | 182  |
|       | CDS_11871_transcript_10813 |                                   | 1.20765E-12 | 52 | 435  |
|       | CDS_11872_transcript_10813 |                                   | 1.9006E-123 | 66 | 435  |
|       | CDS_11873_transcript_10813 |                                   | 1.9006E-123 | 66 | 90   |
|       | CDS_11874_transcript_10814 |                                   | 9.21698E-09 | 53 | 188  |
|       | CDS_11875_transcript_10815 |                                   | 5.36742E-16 | 54 | 622  |
|       | CDS_11876_transcript_10815 |                                   | 1.56031E-87 | 53 | 188  |
|       | CDS_11877_transcript_10815 |                                   | 5.36742E-16 | 54 | 90   |
|       | CDS_11878_transcript_10816 |                                   | 9.21698E-09 | 53 | 188  |
|       | CDS_11879_transcript_10816 |                                   | 5.36742E-16 | 54 | 622  |
|       | CDS_11880_transcript_10816 |                                   | 1.56031E-87 | 53 | 90   |
|       | CDS_12288_transcript_11176 |                                   | 9.21698E-09 | 53 | 622  |
|       | CDS_14189_transcript_12964 |                                   | 1.56031E-87 | 53 | 188  |
|       | CDS_14190_transcript_12965 |                                   | 5.36742E-16 | 54 | 39   |
|       | CDS_15383_transcript_14106 |                                   | 2.65212E-07 | 69 | 1183 |
|       | CDS_15384_transcript_14107 |                                   | 4.8541E-153 | 50 | 163  |
|       | CDS_15385_transcript_14108 |                                   | 4.9947E-14  | 53 | 85   |
|       | CDS_15386_transcript_14109 |                                   | 1.21319E-07 | 54 | 832  |
|       | CDS_15387_transcript_14109 |                                   | 8.90154E-90 | 50 | 827  |
|       | CDS_15388_transcript_14110 |                                   | 2.1975E-90  | 50 | 85   |
|       | CDS_15389_transcript_14111 |                                   | 1.08125E-07 | 54 | 827  |
|       | CDS_15390_transcript_14111 |                                   | 2.1975E-90  | 50 | 832  |
|       | CDS_17731_transcript_16404 |                                   | 7.85433E-90 | 50 | 181  |
|       | CDS_17732_transcript_16405 |                                   | 3.02975E-30 | 61 | 599  |
|       | CDS_22526_transcript_22311 |                                   | 7.68318E-60 | 49 | 569  |
|       | CDS_23795_transcript_24504 |                                   | 1.52443E-60 | 49 | 570  |
|       | CDS_24864_transcript_26674 |                                   | 2.4689E-61  | 49 | 513  |
|       | CDS_3219_transcript_3489   |                                   | 2.17002E-24 | 44 | 469  |
|       | CDS_3220_transcript_3489   |                                   | 1.08973E-30 | 46 | 285  |
|       | CDS_3221_transcript_3489   |                                   | 2.58141E-26 | 48 |      |



|                                |                                                                                                                                                                      |                                                                                                                 |                                                                      |                                  |                                        |
|--------------------------------|----------------------------------------------------------------------------------------------------------------------------------------------------------------------|-----------------------------------------------------------------------------------------------------------------|----------------------------------------------------------------------|----------------------------------|----------------------------------------|
| Mut-7                          | CDS_3222_transcript_3490                                                                                                                                             | gi 646704864 gb KDR12833.1 putative exonuclease mut-7-like protein [ <i>Zootermopsisnevadensis</i> ]            | 5.4797E-153                                                          | 63                               | 579                                    |
|                                | CDS_3223_transcript_3490                                                                                                                                             |                                                                                                                 | 3.36557E-10                                                          | 64                               | 62                                     |
|                                | CDS_3224_transcript_3490                                                                                                                                             |                                                                                                                 | 6.96901E-13                                                          | 61                               | 98                                     |
|                                | CDS_3225_transcript_3491                                                                                                                                             |                                                                                                                 | 5.4797E-153                                                          | 63                               | 579                                    |
|                                | CDS_3226_transcript_3491                                                                                                                                             |                                                                                                                 | 6.96901E-13                                                          | 61                               | 98                                     |
|                                | CDS_3227_transcript_3492                                                                                                                                             |                                                                                                                 | 3.36557E-10                                                          | 64                               | 62                                     |
|                                | CDS_3228_transcript_3492                                                                                                                                             |                                                                                                                 | 2.61635E-30                                                          | 54                               | 222                                    |
|                                | CDS_3229_transcript_3492                                                                                                                                             |                                                                                                                 | 5.4797E-153                                                          | 63                               | 579                                    |
|                                | CDS_3230_transcript_3493                                                                                                                                             |                                                                                                                 | 3.36557E-10                                                          | 64                               | 62                                     |
|                                | CDS_3231_transcript_3493                                                                                                                                             |                                                                                                                 | 6.96901E-13                                                          | 61                               | 98                                     |
|                                | CDS_3232_transcript_3494                                                                                                                                             |                                                                                                                 | 5.4797E-153                                                          | 63                               | 579                                    |
|                                | CDS_3233_transcript_3494                                                                                                                                             |                                                                                                                 | 3.0543E-172                                                          | 59                               | 728                                    |
|                                | CDS_3234_transcript_3494                                                                                                                                             |                                                                                                                 | 3.36557E-10                                                          | 64                               | 62                                     |
| HPS4                           | CDS_18050_transcript_16726<br>CDS_18051_transcript_16727                                                                                                             | gi 646704291 gb KDR12556.1 Hermansky-Pudlak syndrome 4 protein [ <i>Zootermopsisnevadensis</i> ]                | 0<br>0                                                               | 57<br>57                         | 929<br>929                             |
| Belle                          | CDS_2216_transcript_2724<br>CDS_3872_transcript_4046                                                                                                                 | gi 805814300 ref XP_012148170.1 PREDICTED: DEAD-box ATP-dependent RNA helicase 20 [ <i>Megachilerotundata</i> ] | 4.07E-08<br>0                                                        | 66<br>87                         | 57<br>481                              |
| Gawky                          | CDS_1202_transcript_1771<br>CDS_1203_transcript_1772<br>CDS_1204_transcript_1773<br>CDS_1199_transcript_1770<br>CDS_1207_transcript_1774<br>CDS_1209_transcript_1775 | gi 572313755 ref XP_006622570.1 PREDICTED: protein Gawky-like [ <i>Apis dorsata</i> ]                           | 2.41E-51<br>2.41E-51<br>2.41E-51<br>2.41E-51<br>2.41E-51<br>2.41E-51 | 68<br>68<br>68<br>68<br>68<br>68 | 187<br>187<br>187<br>187<br>187<br>187 |
| CLP1                           | CDS_17314_transcript_15991                                                                                                                                           | gi 646701253 gb KDR11058.1 CLP1-like protein [ <i>Zootermopsisnevadensis</i> ]                                  | 0                                                                    | 88                               | 414                                    |
| V-type proton ATPase subunit H | CDS_9906_transcript_9079<br>CDS_9907_transcript_9080<br>CDS_9908_transcript_9080<br>CDS_9909_transcript_9081<br>CDS_9910_transcript_9082                             | gi 646704147 gb KDR12485.1 V-type proton ATPase subunit H [ <i>Zootermopsisnevadensis</i> ]                     | 0<br>1.65118E-96<br>8.4095E-179<br>8.4095E-179<br>0                  | 80<br>85<br>92<br>92<br>88       | 558<br>182<br>289<br>289<br>484        |

|        |                                       |                                        |          |    |     |
|--------|---------------------------------------|----------------------------------------|----------|----|-----|
| Rab-7a | CDS_24868_transcript_26695            | >gi 936578738 ref XP_014204028.1 PREDI | 9.8E-128 | 93 | 208 |
|        | CDS_24869_transcript_26696            | CTED: ras-related protein Rab-7a       | 1.1E-127 | 93 | 208 |
|        | CDS_1706_transcript_2230              | [Copidosomafloridanum]                 | 7E-133   | 93 | 206 |
|        | CDS_1707_transcript_2231              | >gi 936578741 ref XP_014204029.1       | 7E-133   | 93 | 206 |
|        | CDS_1708_transcript_2232              | PREDICTED: ras-related protein Rab-7a  | 7E-133   | 93 | 206 |
|        | CDS_21319_transcript_20533            | [Copidosomafloridanum]                 | 4.5E-113 | 87 | 207 |
|        | CDS_21320_transcript_20534            | >gi 936578744 ref XP_014204030.1       | 3.3E-115 | 72 | 287 |
|        |                                       | PREDICTED: ras-related protein Rab-7a  |          |    |     |
|        |                                       | [Copidosomafloridanum]                 |          |    |     |
|        |                                       | >gi 936578747 ref XP_014204031.1       |          |    |     |
|        | PREDICTED: ras-related protein Rab-7a |                                        |          |    |     |
|        | [Copidosomafloridanum]                |                                        |          |    |     |
|        | >gi 936578750 ref XP_014204032.1      |                                        |          |    |     |
|        | PREDICTED: ras-related protein Rab-7a |                                        |          |    |     |
|        | [Copidosomafloridanum]                |                                        |          |    |     |
|        | >gi 936578753 ref XP_014204033.1      |                                        |          |    |     |
|        | PREDICTED: ras-related protein Rab-7a |                                        |          |    |     |
|        | [Copidosomafloridanum]                |                                        |          |    |     |
|        | >gi 936578756 ref XP_014204034.1      |                                        |          |    |     |
|        | PREDICTED: ras-related protein Rab-7a |                                        |          |    |     |
|        | [Copidosomafloridanum]                |                                        |          |    |     |
|        | >gi 936578759 ref XP_014204035.1      |                                        |          |    |     |
|        | PREDICTED: ras-related protein Rab-7a |                                        |          |    |     |
|        | [Copidosomafloridanum]                |                                        |          |    |     |
|        | >gi 936578762 ref XP_014204037.1      |                                        |          |    |     |
|        | PREDICTED: ras-related protein Rab-7a |                                        |          |    |     |
|        | [Copidosomafloridanum]                |                                        |          |    |     |
|        | >gi 936578765 ref XP_014204038.1      |                                        |          |    |     |
|        | PREDICTED: ras-related protein Rab-7a |                                        |          |    |     |
|        | [Copidosomafloridanum]                |                                        |          |    |     |
| RISC   | CDS_2188_transcript_2700              | gi 646700117 gb KDR10415.1 putative    | 6.2E-23  | 48 | 353 |
|        | CDS_4702_transcript_4696              | RISC-loading complex subunit           | 3E-149   | 81 | 331 |
|        | CDS_2185_transcript_2699              | [Zootermopsisnevadensis]               | 6.2E-23  | 48 | 353 |

|                          |                            |                                          |             |      |      |
|--------------------------|----------------------------|------------------------------------------|-------------|------|------|
| DEAD box protein         | CDS_17843_transcript_16505 | gi 242021722 ref XP_002431292.1 DEAD     | 5.8E-110    | 61   | 474  |
|                          | CDS_3872_transcript_4046   | box ATP-dependent RNA helicase, putative | 0           | 87   | 481  |
|                          | CDS_19922_transcript_18854 | [Pediculus humanus corporis]             | 4.99E-06    | 65   | 84   |
|                          | CDS_2216_transcript_2724   | >gi 212516560 gb EEB18554.1  DEAD box    | 4.07E-08    | 66   | 57   |
|                          |                            | ATP-dependent RNA helicase, putative     |             |      |      |
|                          |                            | [Pediculus humanus corporis]             |             |      |      |
| dsRNase 2                | CDS_24848_transcript_26641 | gi 599126388 gb AHN55089.1 dsRNase 2,    | 2.93687E-36 | 76   | 111  |
|                          |                            | partial [Schistocercagregaria]           |             |      |      |
| RDRP                     | CDS_2003_transcript_2493   | gi 527355229 gb AGS13094.1 RdRP          | 0           | 95   | 330  |
|                          | CDS_2006_transcript_2493   | [Cowpea mild mottle virus]               | 2.3133E-06  | 44   | 198  |
|                          | CDS_2007_transcript_2494   |                                          | 9.2932E-174 | 87   | 331  |
|                          | CDS_2009_transcript_2494   |                                          | 0           | 95   | 330  |
|                          | CDS_2010_transcript_2494   |                                          | 0           | 57   | 1027 |
|                          | CDS_2012_transcript_2495   |                                          | 4.7604E-153 | 95   | 255  |
|                          | CDS_2013_transcript_2495   |                                          | 9.2932E-174 | 87   | 331  |
|                          | CDS_2017_transcript_2495   |                                          | 0           | 57   | 1027 |
|                          | CDS_2018_transcript_2496   |                                          | 0           | 95   | 330  |
|                          | CDS_2020_transcript_2496   |                                          | 9.2932E-174 | 87   | 331  |
|                          | CDS_2021_transcript_2496   |                                          | 0           | 57   | 1027 |
|                          | CDS_2023_transcript_2497   |                                          | 9.2932E-174 | 87   | 331  |
|                          | CDS_2024_transcript_2497   |                                          | 2.3721E-156 | 56   | 833  |
|                          | CDS_2026_transcript_2498   |                                          | 0           | 95   | 330  |
|                          | CDS_2027_transcript_2498   |                                          | 0           | 74   | 512  |
|                          | CDS_2028_transcript_2498   |                                          | 2.22675E-31 | 45   | 477  |
|                          | CDS_2030_transcript_2498   |                                          | 9.2932E-174 | 87   | 331  |
| CDS_2032_transcript_2499 |                            | 0                                        | 57          | 1027 |      |

**Table S6: Primer sequences for dsRNA template of potential RNAi machinery**

| <b>Genes</b>     | <b>dsRNA Primer Sequence</b>                                                                     |
|------------------|--------------------------------------------------------------------------------------------------|
| <i>Dicer-2</i>   | Fwd: 5'TAATACGACTCACTATAGGGCCATCACCTACTCATTC3'<br>Rev: 5'TAATACGACTCACTATAGGGGTTAGTAGAGCCTTCAG3' |
| <i>Staufen</i>   | Fwd: 5'TAATACGACTCACTATAGCAGGAGCCTCTTTATAC 3'<br>Rev: 5'TAATACGACTCACTATAGCCTTAGGAAAGTCTGAG3'    |
| <i>Aubergine</i> | Fwd: 5'TAATACGACTCACTATAGGGCTAAAGCTGAGAAGAGG3'<br>Rev: 5'TAATACGACTCACTATAGGGCACCTCCGTATTTACTC3' |
