# Supplementary material for: RNA sequencing, selection of reference genes and demonstration of feeding RNAi in Thrips tabaci (Lind.) (Thysanoptera: Thripidae)
Source: PubMed Central journal article supplement (PMC6380046; doi:10.1186/s12867-019-0123-1), 2019-02-18
Supplement: 12867_2019_123_MOESM5_ESM.pdf [file 12867_2019_123_MOESM5_ESM.pdf]

**Fig. S1 TheStaufen sequences and their domains characterized across different insect species using SMART (Simple Modular Architecture Research Tool)**

*Thripstabaci*

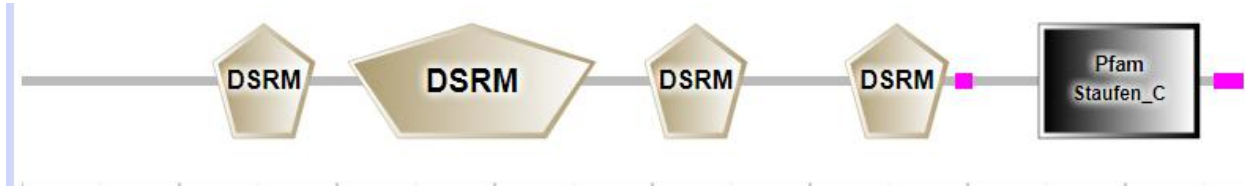

*Frankliniellaoccidentalis*XM\_026420079.1

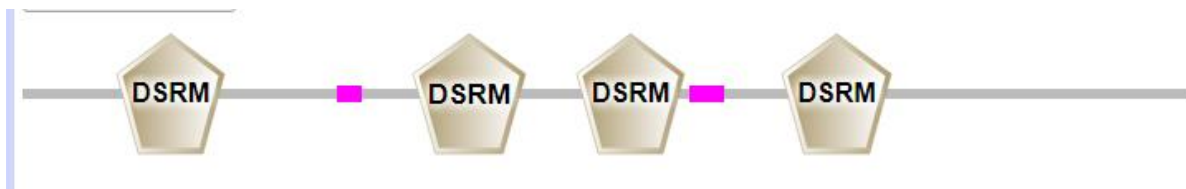

*Leptinotarsadecemlineata* XP\_023023346.1

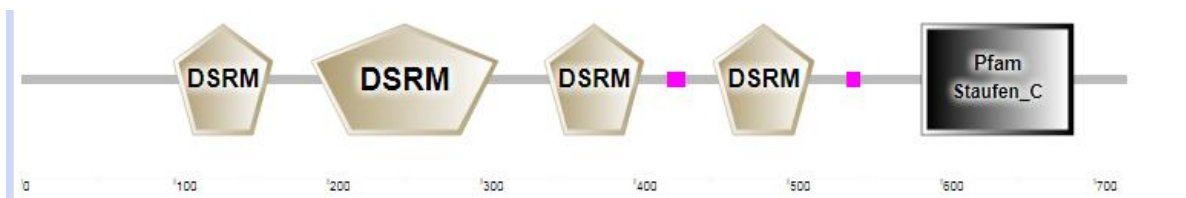

*Triboliumcastaneum*EFA11564.2

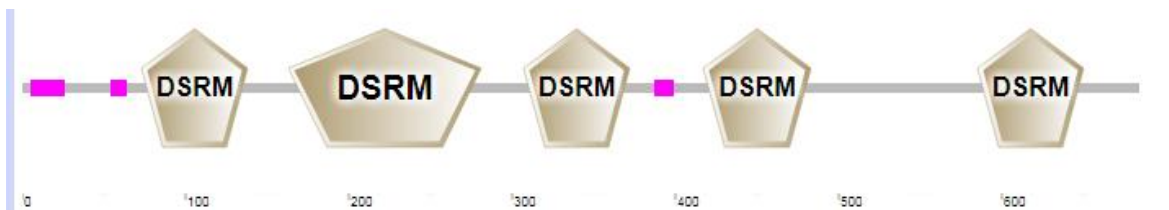

*Onthophagustaurus* XP\_022914722.1

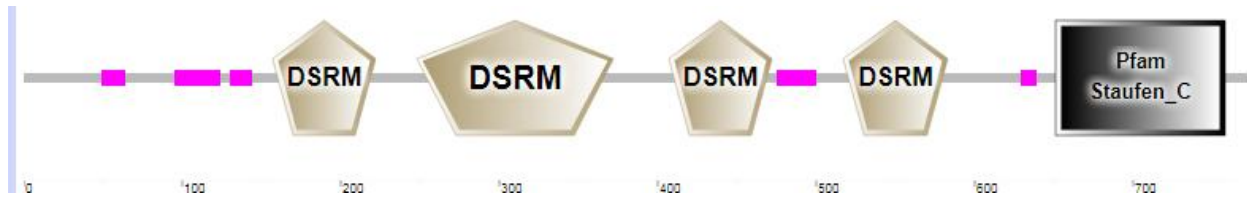

*Riptortuspedestris* BAN21133.1

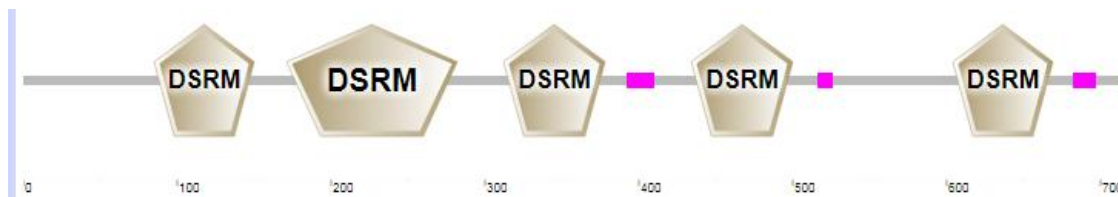

*Culexquinquefasciatus* XM\_001841817.1

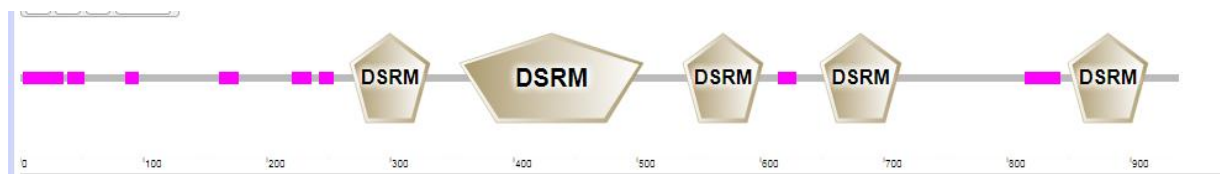

*Phenococcussolenopsis* (SRP133470)

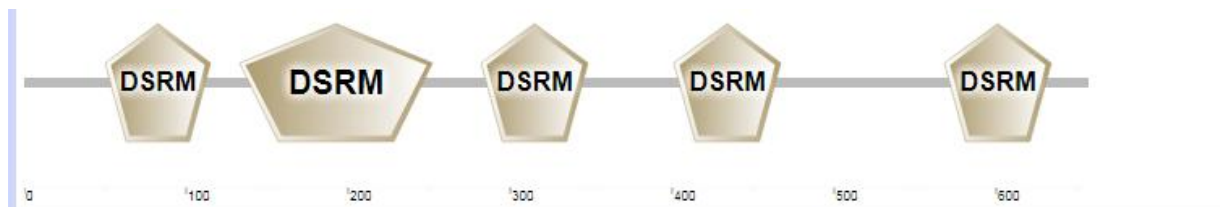

*Bemisiatabaci*(MAMS00000000)

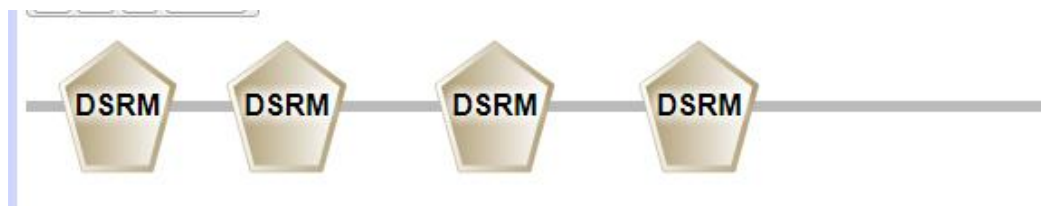

*Cimexlectularis*XM\_014397141.2

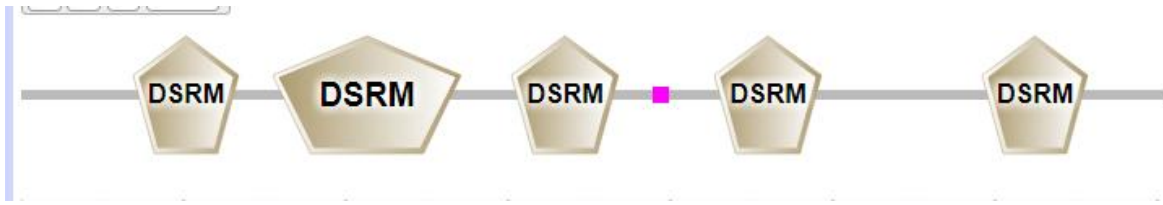

*Drosophila malenogaster*NM\_001169714.2

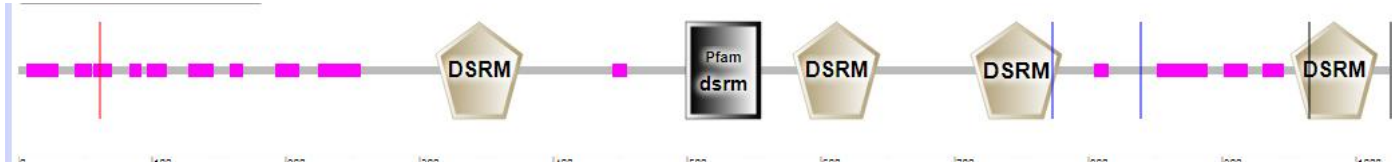

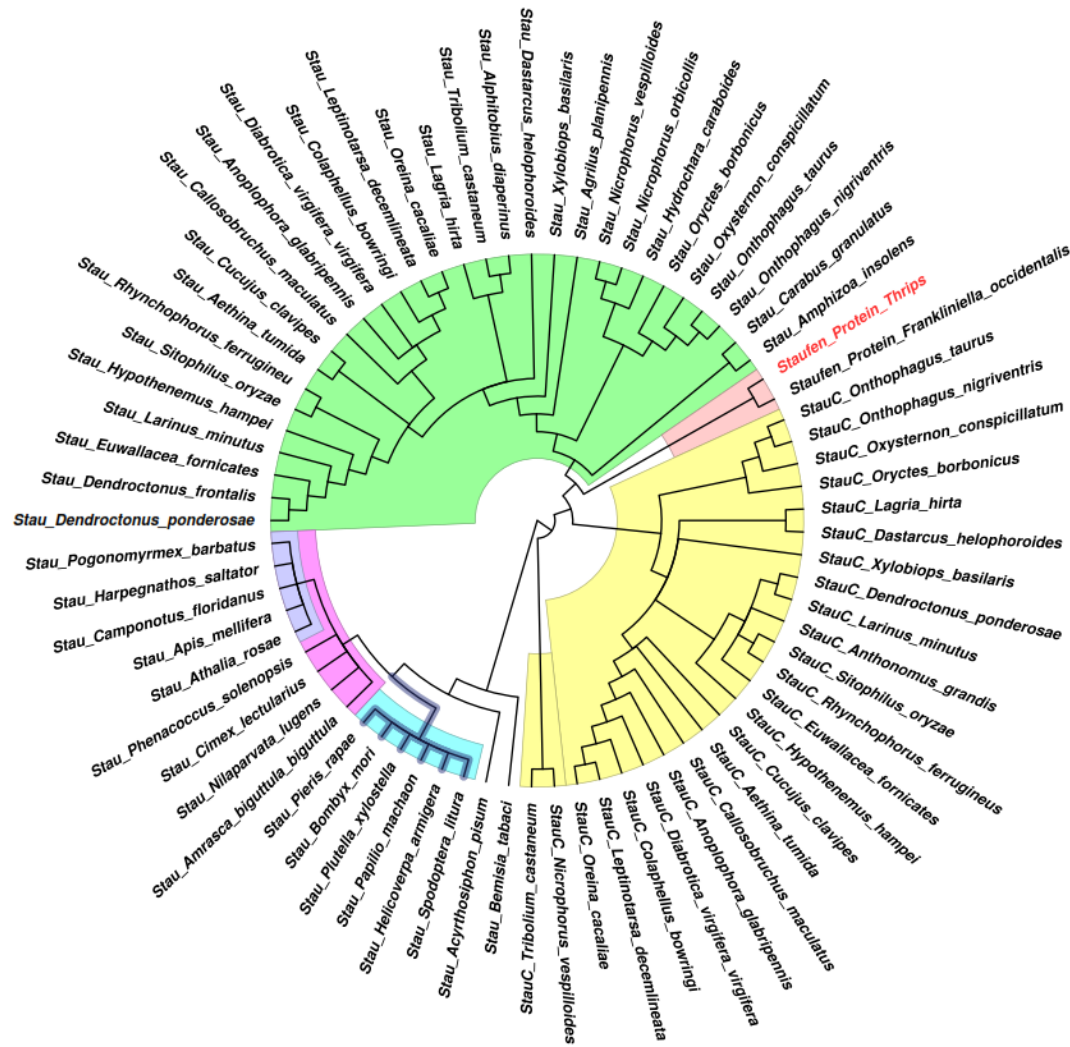

Fig. S2 Phylogenetic analysis of Staufenand StauCsequences within insects of different orders

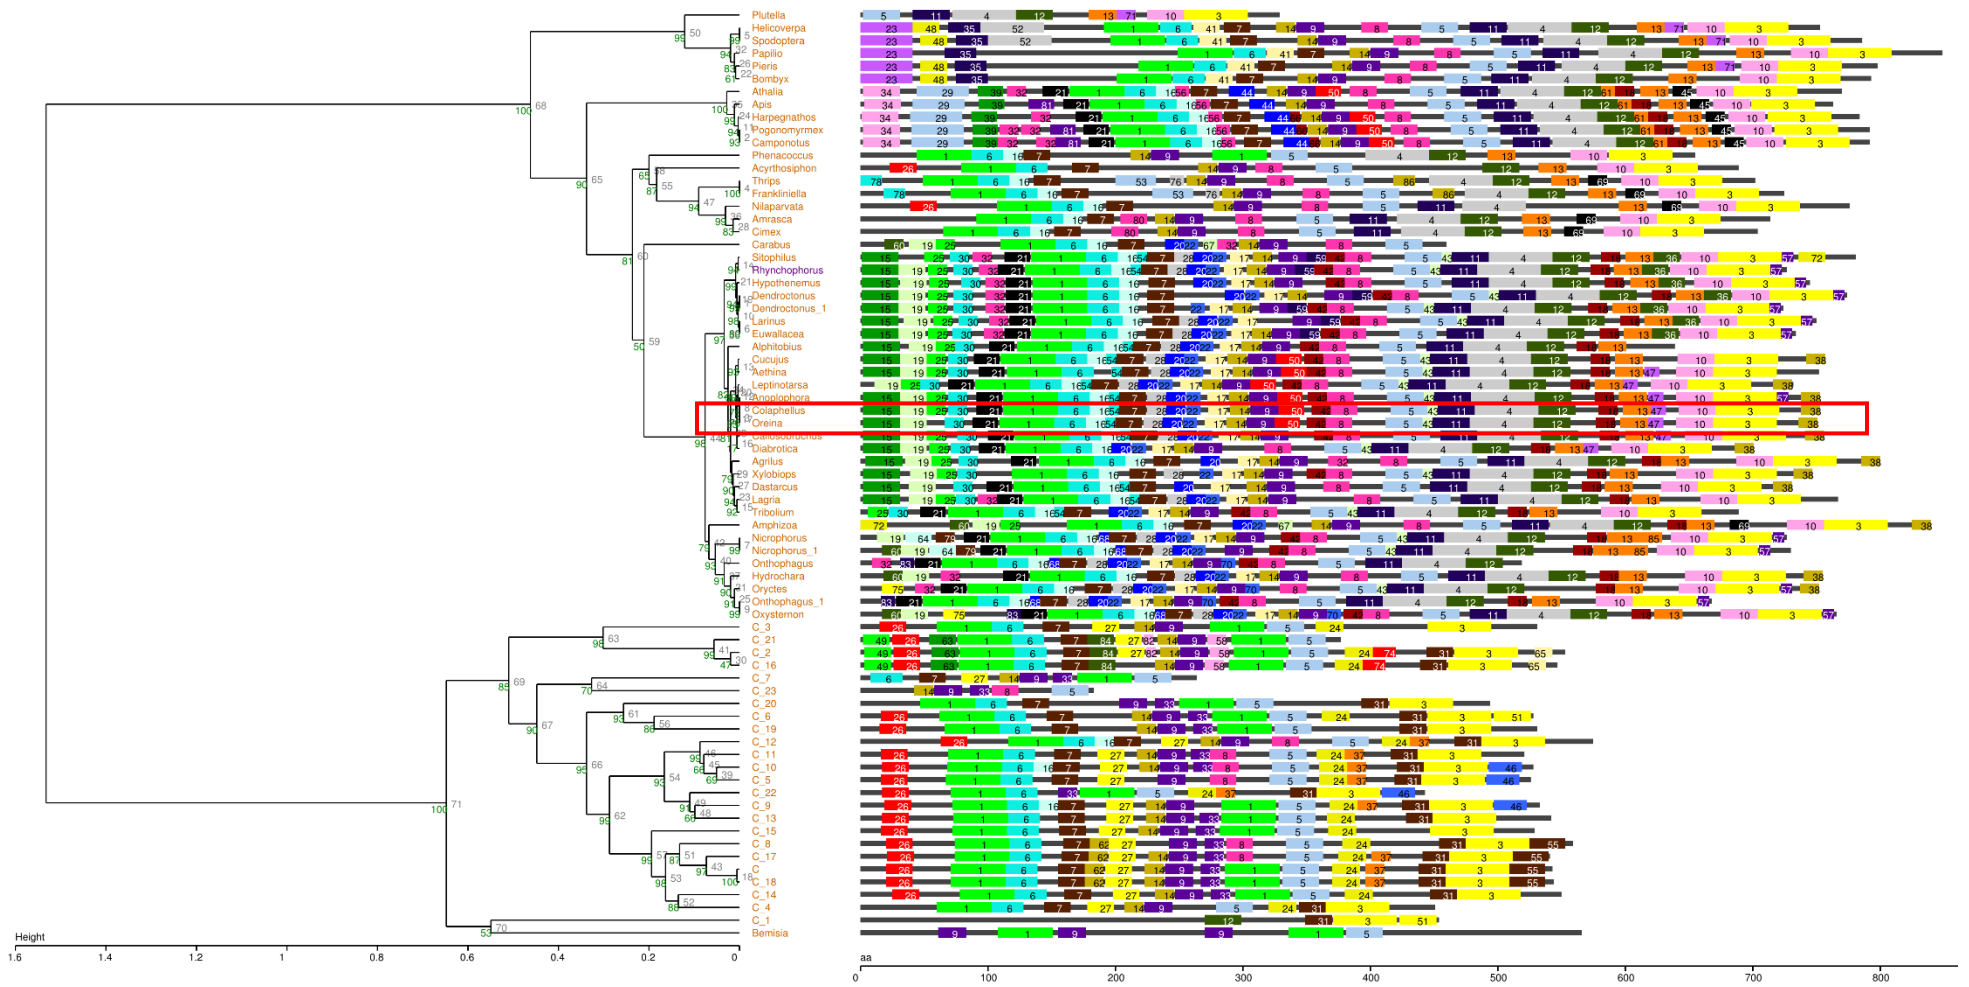

**Fig.S3** Phylogenetic analysis of Staufen and StauC sequences within insects of different orders using SALAD for the depiction of unique protein motifs in *Thripstabaci*
