# Supplementary material for: RNA sequencing, selection of reference genes and demonstration of feeding RNAi in Thrips tabaci (Lind.) (Thysanoptera: Thripidae)
Source: PubMed Central journal article supplement (PMC6380046; doi:10.1186/s12867-019-0123-1), 2019-02-18
Supplement: 12867_2019_123_MOESM6_ESM.pdf [file 12867_2019_123_MOESM6_ESM.pdf]

**Fig. S1 Quality of RNA samples on 1% denatured Agarose gel (SI denotes RNA of *Thrips tabaci*; BI sample is not related to this manuscript)**

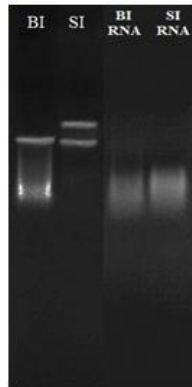

**Fig. S2 Library Profile of Thrips RNA on Agilent Tape Station using High sensitivity D1000 Screen Tape**

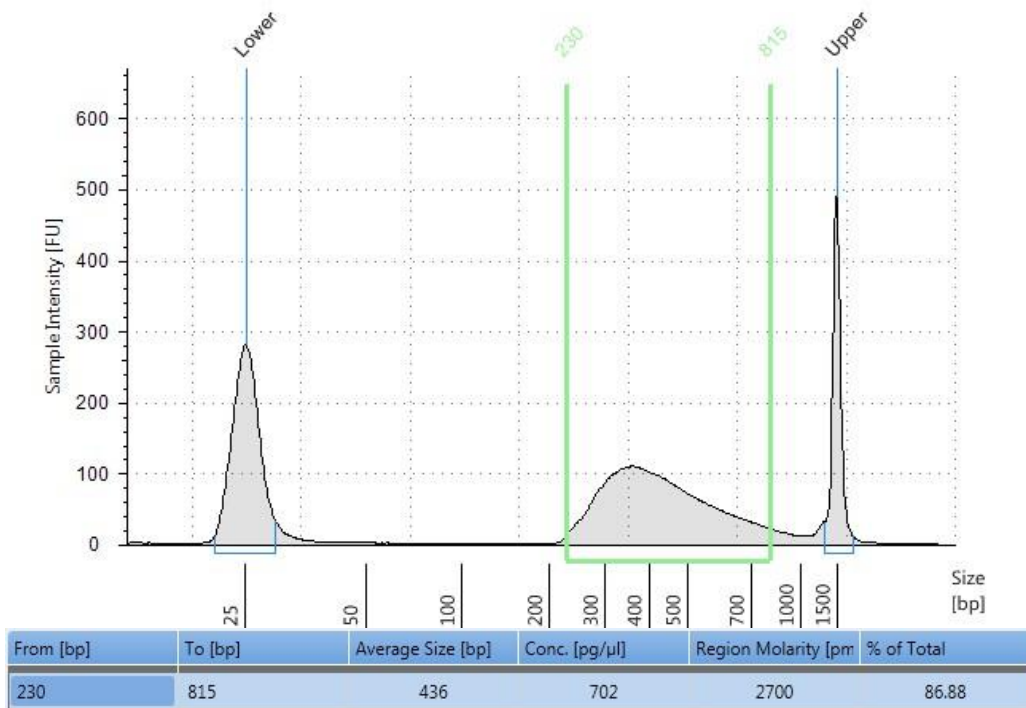

Fig. S3 Feeding RNAi assay setup for *Thrips tabaci*

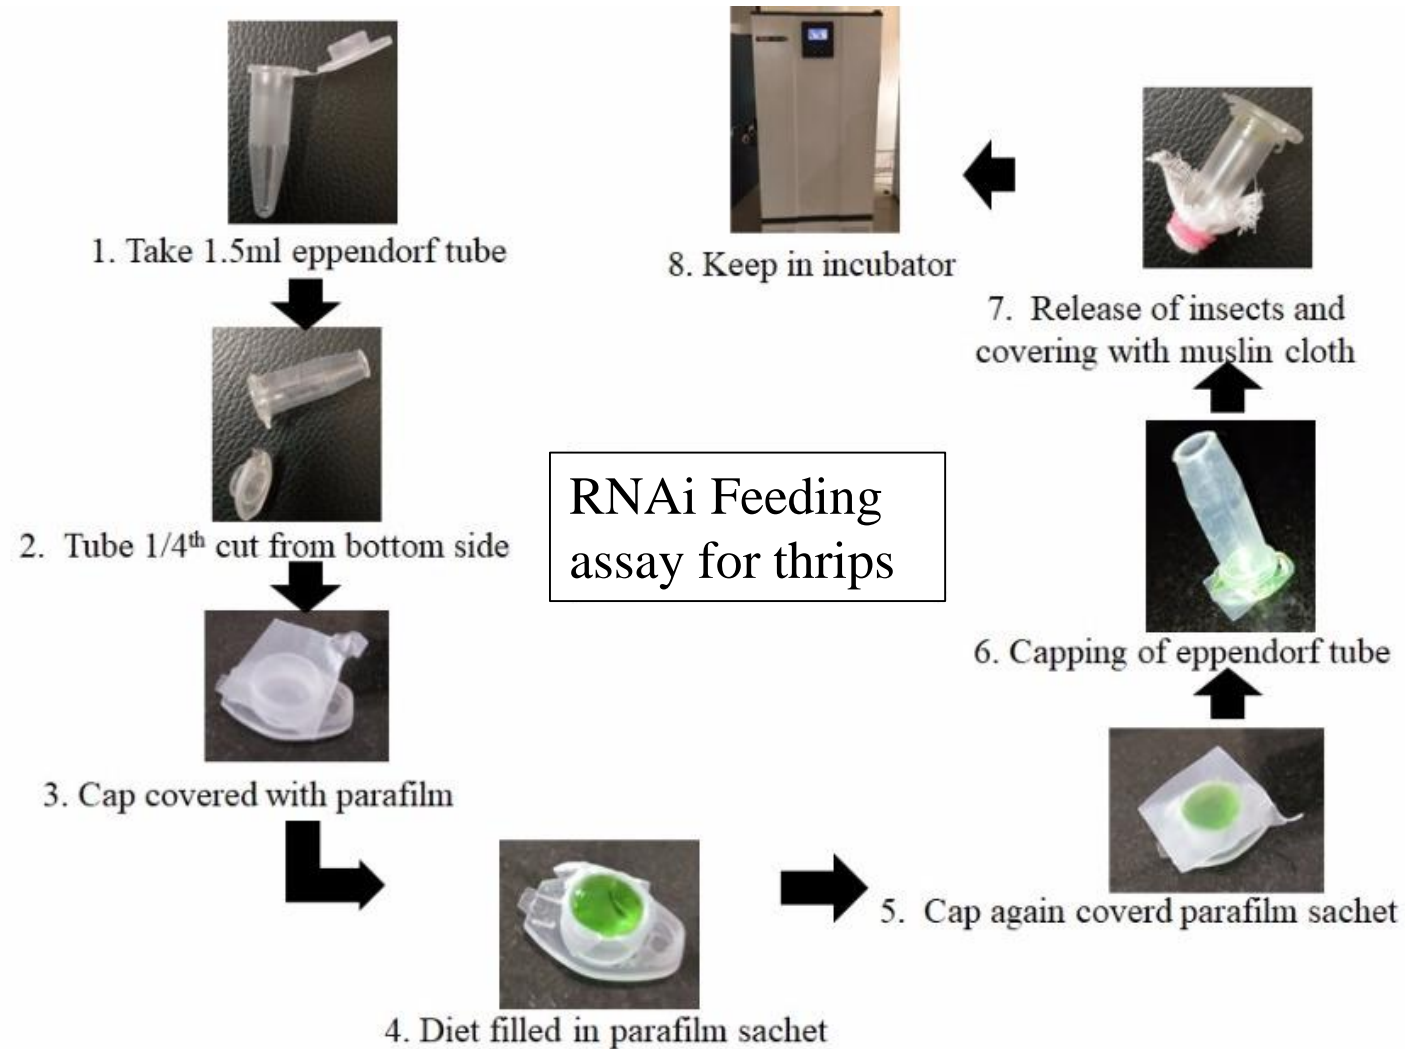

Modified after Singh et al 2018 ([dx.doi.org/10.17504/protocols.io.ksgcwbw](https://doi.org/10.17504/protocols.io.ksgcwbw))
